# Supplementary material
Source: publisher figshare collection journal article supplement (https://frontiersin.figshare.com/ndownloader/files/18024107)

**Supplementary Figure 2.** The distribution of main orders during the different ADs in time. The orders of *Bacteroidales*, *Clostridiales*, and *Methanosarcinales* predominated the anaerobic digestion processes. The orders are listed in two groups (“main” and “minor” orders) according to their relative abundances.

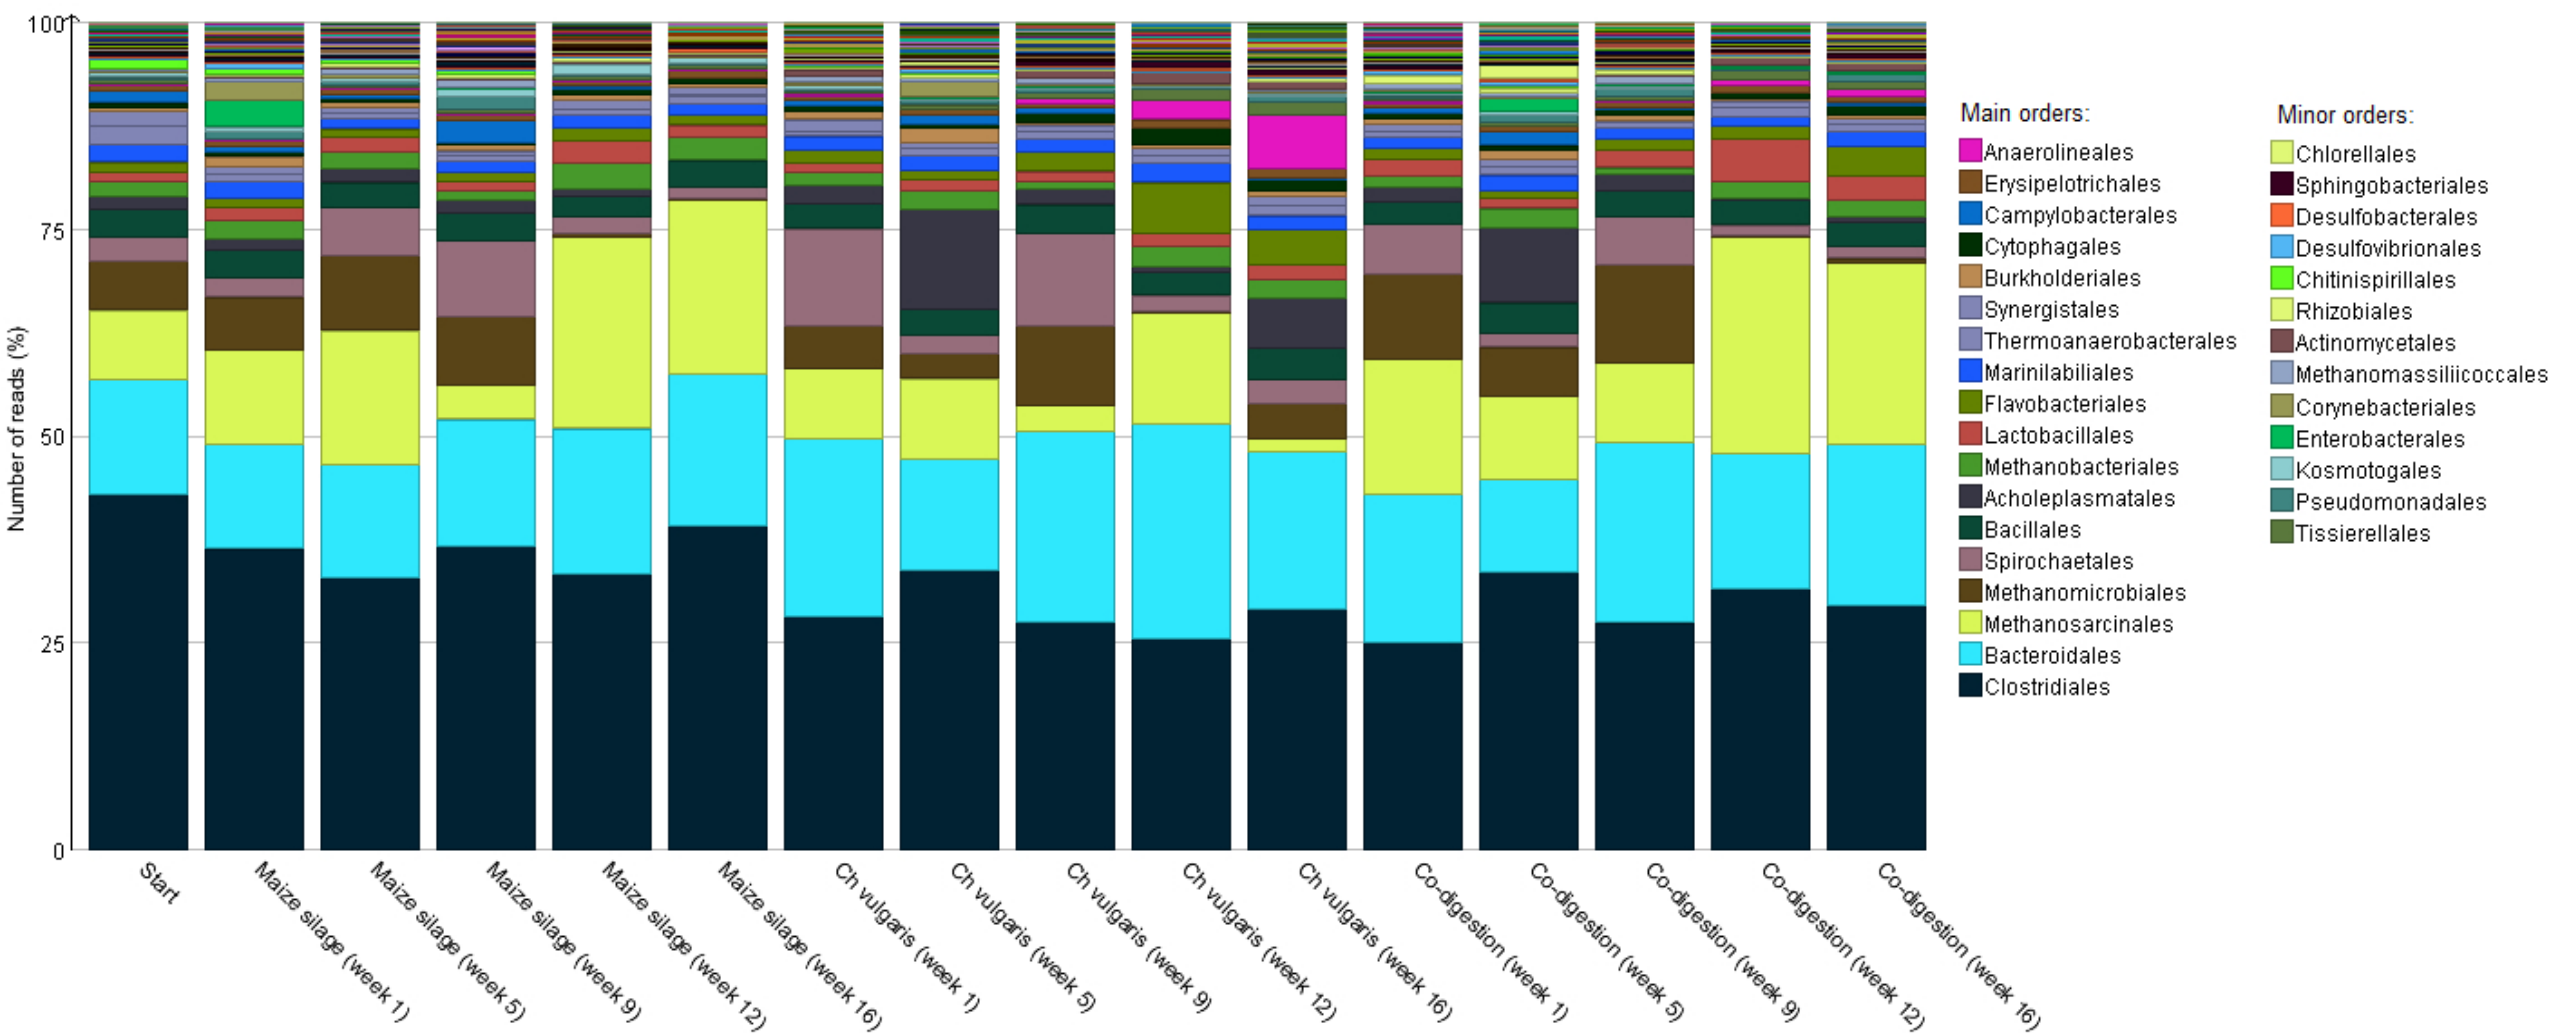

Supplement: Supplementary file 1 [file 18024107]
